# Supplementary material for: Nanofiltration Performance of Poly(p-xylylene) Nanofilms with Imidazole Side Chains
Source: MDPI journal article supplement (doi:10.3390/polym15153309), 2023-08-04
Supplement: s1 [file s1]

## Nanofiltration Performance of Poly(p-xylylene) Nanofilms with Imidazole Side Chains

Satsuki Yoshida, Takeshi Shii, Yu Kitazawa, Manuela L. Kim, Eugenio H. Otal, Yoshiyuki Hattori and Mutsumi Kimura \*

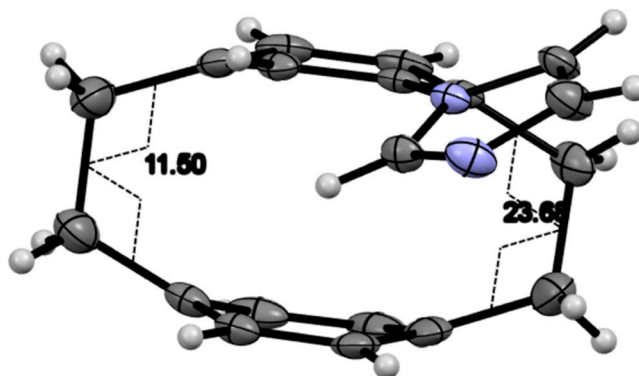

Figure S1 Angle difference of two ethylene bridges in **1**

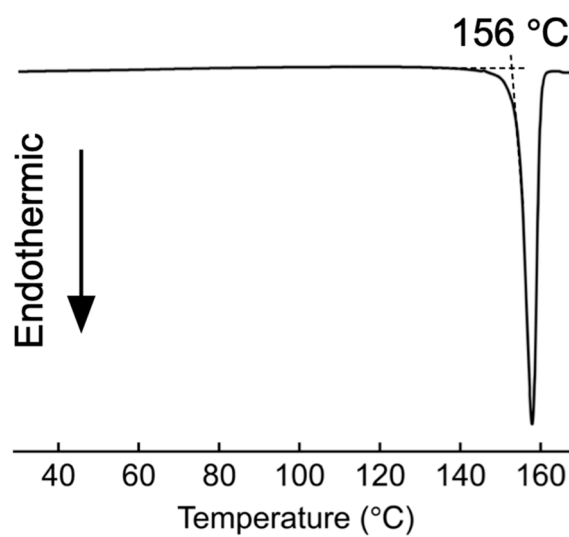

Figure S2 DSC profile of **1** at the heating process (heating rate: 10 °C/min).

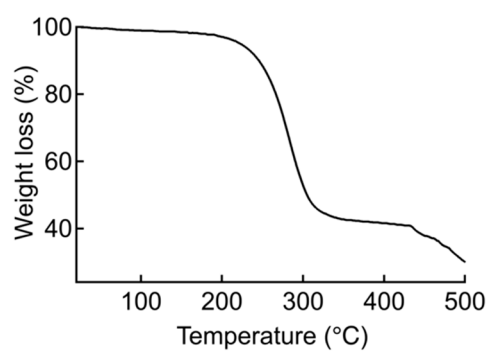

**Figure S3** TGA profile of **1** under N<sub>2</sub> atmosphere (heating rate: 10 °C/min).

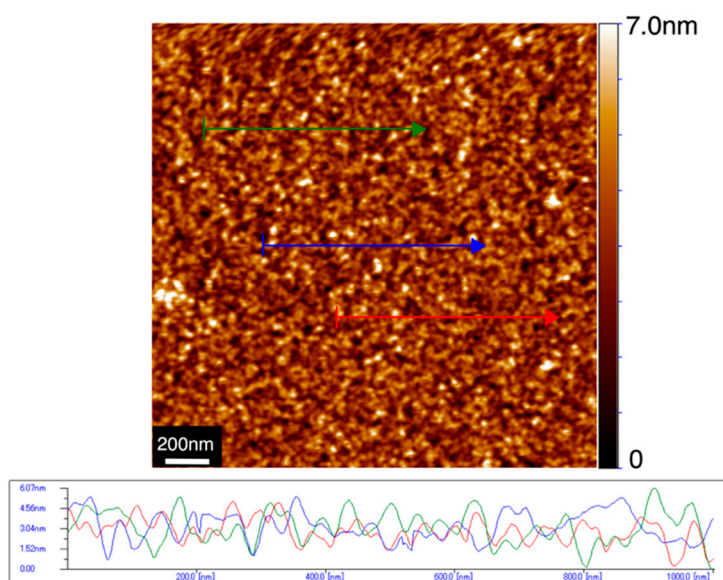

**Figure S4** AFM image (2x2 μm) of **2** on a Si wafer ( $R_a = 0.87$  nm) and line scans of height changes at three arrows (red, blue, and green arrows).

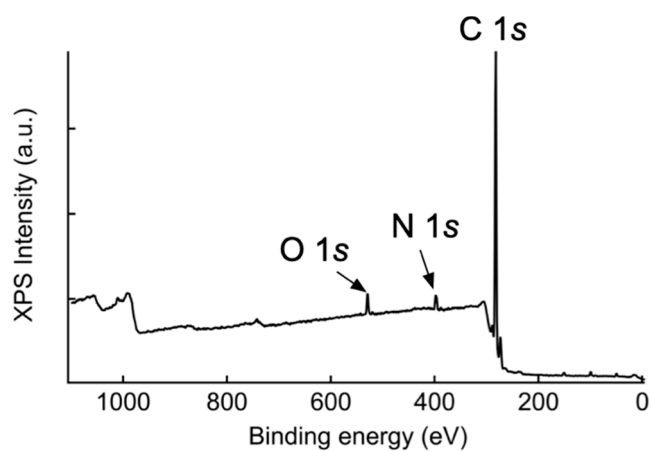

**Figure S5** XPS wide-scan spectrum of **2** deposited onto a Si wafer.

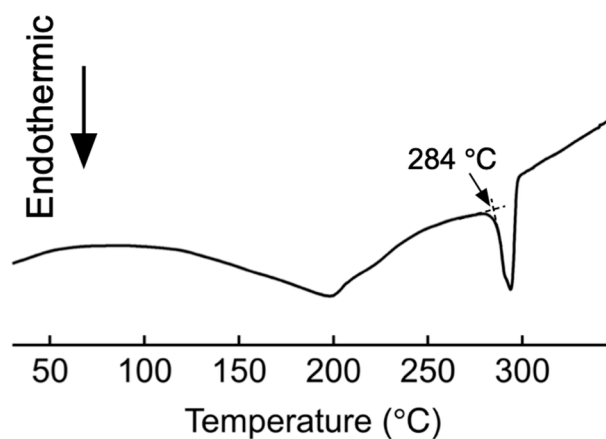

**Figure S6** DSC profile of **2** at the heating process (heating rate: 10 °C/min).

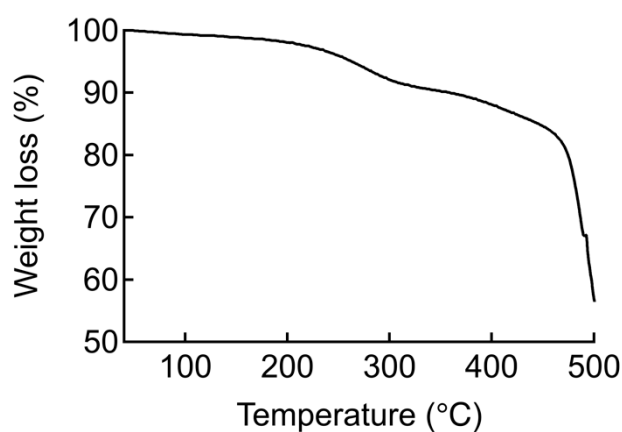

**Figure S7** TGA profile of **2** under N<sub>2</sub> atmosphere (heating rate: 10 °C/min).

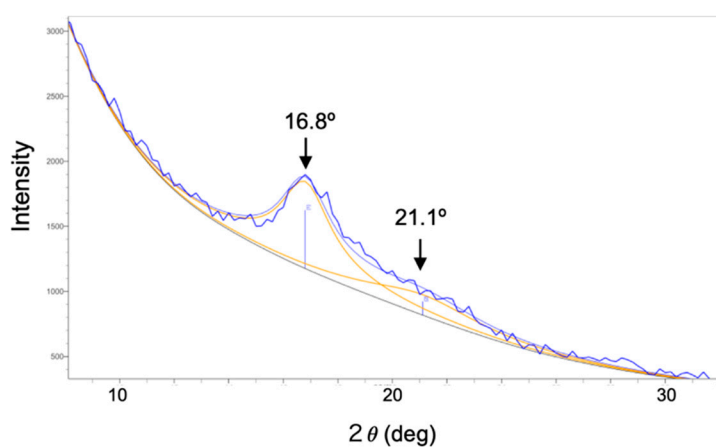

**Figure S8** Out-of-plane XRD of 11.1 nm-thick film **2** on the Si wafer (blue line: XRD reflection, yellow line: deconvolution into two peaks, and gray line: base line).

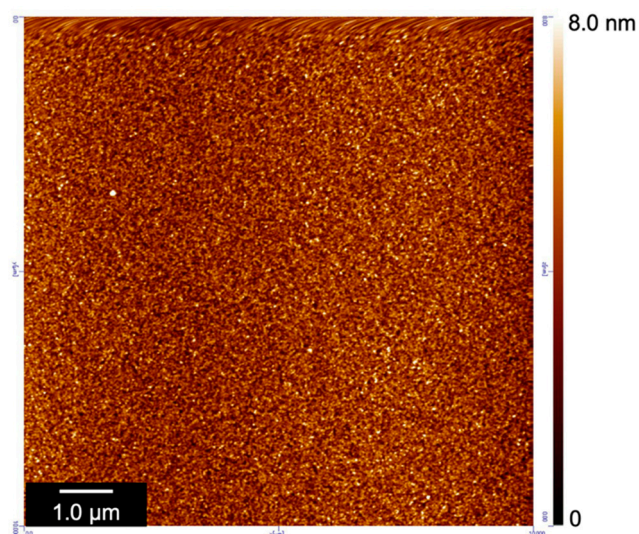

**Figure S9** AFM image of **2** after treatment with 0.1 mol/L HCl.

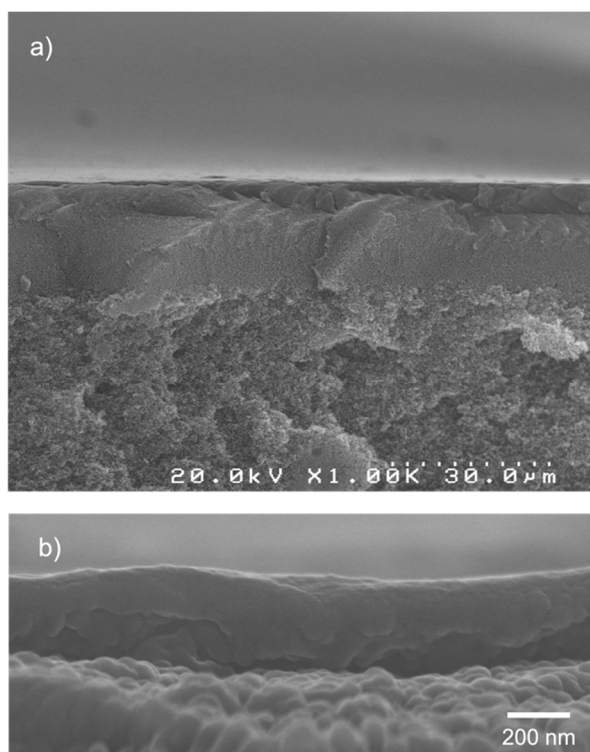

**Figure S10** Cross-cut FE-SEM image of **2**-coated UF membrane;

- a) Cross-cut image of **2**-coated polyethersulfone layer in UF membrane and
- b) Magnified image for the surface of the **2**-coated membrane.

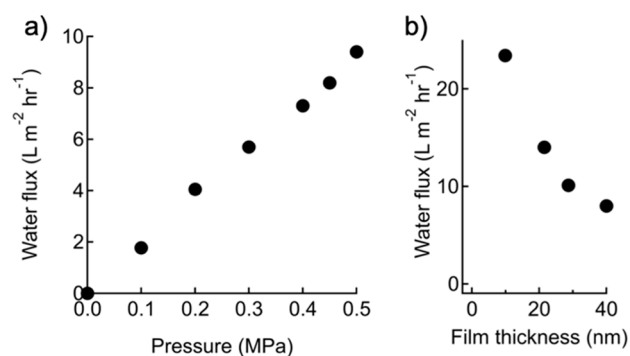

**Figure S11** Dependences of water flux of **2** on pressure (a) and film thickness (b) by using a dead-end membrane filtration system at room temperature.

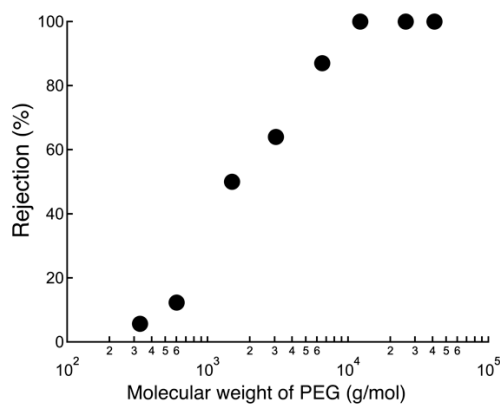

**Figure S12** Determination of MWCO for **2** from the rejection curve of PEGs.

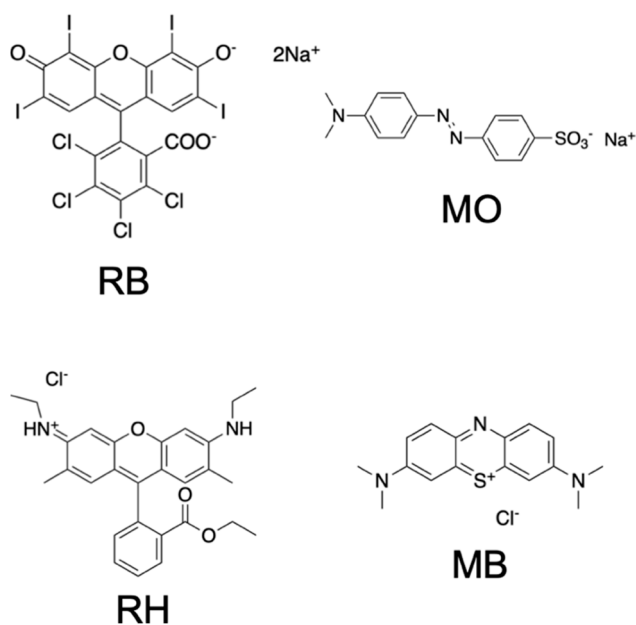

**Figure S13** Chemical structures of water-soluble dyes.

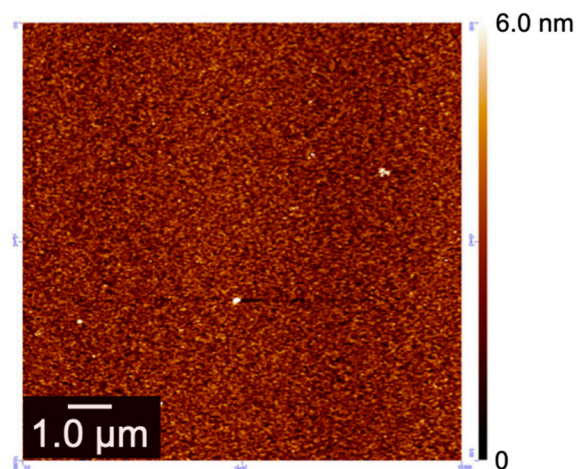

**Figure S14** AFM image of **2** film after treatment with an aqueous solution of  $\text{Zn}(\text{NO}_3)_2 \cdot 6\text{H}_2\text{O}$ .

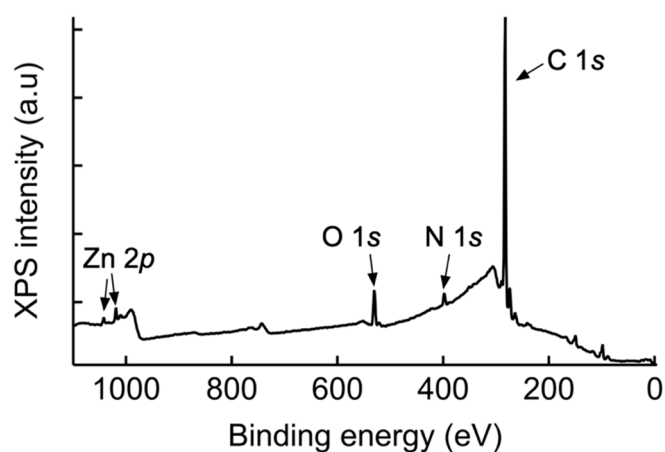

**Figure S15** XPS wide-scan spectrum of **2** with an aqueous solution of  $\text{Zn}(\text{NO}_3)_2 \cdot 6\text{H}_2\text{O}$ .

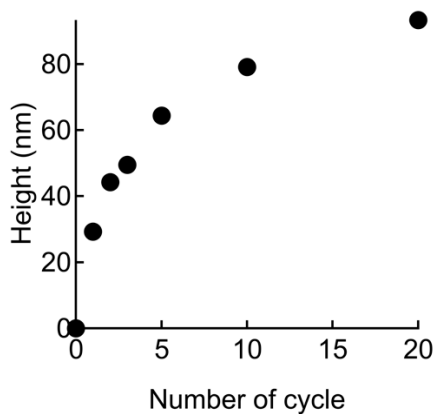

**Figure S16** Height change with an increasing number of cycles for the growth of ZIF-L on **2**. Heights (average values for three samples) were determined by AFM.

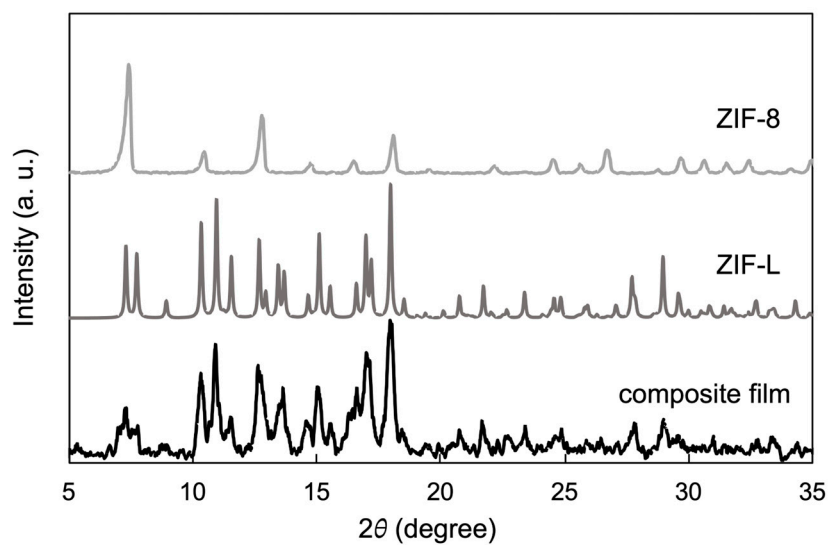

**Figure 17** XRD patterns of **2**/ZIF-L composite film on a Si wafer and reference patterns of ZIF-8 and ZIF-L.

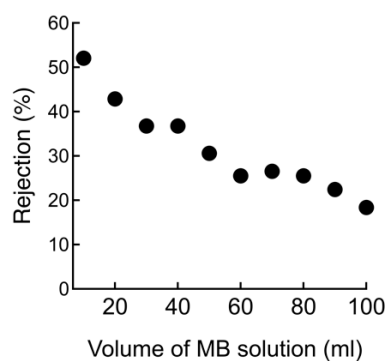

**Figure S18** Rejection ratio change of **2**/ZIF-L composite membrane during continuous feeding of an aqueous solution of MB ( $[MB] = 10 \mu M$ ).
